1 **Temporal Association Between Particulate Matter Pollution**  
2 **and Case Fatality Rate of COVID-19 in Wuhan, China**

3

4 Ye Yao<sup>†</sup>, Ph.D., Fudan University, Shanghai China

5 Jinhua Pan<sup>†</sup>, M.Sc., Fudan University, Shanghai China

6 Zhixi Liu<sup>†</sup>, B.Med., Fudan University, Shanghai China

7 Xia Meng<sup>†</sup>, Ph.D., Fudan University, Shanghai China

8 Weidong Wang, B.Med., Fudan University, Shanghai China

9 Haidong Kan<sup>\*</sup>, Ph.D. & M.D., Fudan University, Shanghai China

10 Weibing Wang<sup>\*</sup>, Ph.D. & M.D., Fudan University, Shanghai China

11

12 <sup>†</sup>Dr. Yao, Ms. Pan, Ms. Liu and Dr. Meng contributed equally to this  
13 letter.

14

15 <sup>\*</sup> Corresponding authors:

16 Dr. Weibing Wang, School of Public Health, Fudan University, Shanghai

17 200032, China, Email: [wwb@fudan.edu.cn](mailto:wwb@fudan.edu.cn)

18 Dr. Haidong Kan, School of Public Health, Fudan University, Shanghai

19 200032, China, Email: [kanh@fudan.edu.cn](mailto:kanh@fudan.edu.cn)

20 Word account: 999

## 21 **Abstract**

22       The Coronavirus (COVID-19) epidemic, which was first reported in December  
23 2019 in Wuhan, China, has caused 3,314 death as of March 31, 2020 in China. This  
24 study aimed to investigate the temporal association between case fatality rate (CFR)  
25 of COVID-19 and particulate matter (PM) in Wuhan. We conducted a time series  
26 analysis to explore the temporal day-by-day associations. We found COVID-19 held  
27 higher case fatality rate with increasing concentrations of PM<sub>2.5</sub> and PM<sub>10</sub> in temporal  
28 scale, which may affect the process of patients developed from mild to severe and  
29 finally influence the prognosis of COVID-19 patients.

30

## 31 **Introduction**

32       COVID-19 is a new emerging infectious disease that poses massive challenges to  
33 global health and the economy. As of March 31, 2020, there have been more than  
34 82,601 confirmed cases in China, and a total of 3,314 deaths have occurred in China.  
35 Wuhan city, the source of the outbreak, have accounted for 61.0% of the total number  
36 of cases and 76.9% of the deaths in China. Some researchers have found that air  
37 pollution can affect the case fatality rate (CFR) of severe acute respiratory syndrome  
38 (SARS)<sup>1</sup>. The COVID-19, as a respiratory disease which has a certain degree of  
39 similarity with SARS, may also have some relations between CFR and air pollution<sup>2</sup>.  
40 Particulate matter (PM) is the main primary air pollutant. Therefore, this study aimed  
41 to investigate the temporal association between CFR of COVID-19 and PM in

42 Wuhan.

43

#### 44 **Methods**

45 We collected COVID-19 confirmed cases and deaths information which was  
46 reported by the National Health Commission. We defined case fatality rate (CFR) as  
47 deaths at day.x /new infection cases at day.x<sup>-3</sup> (where T=average time period (T) from  
48 case infection to death<sup>1</sup>). Daily CFR were calculated for Wuhan city from January 19  
49 to March 15 (very few confirmed cases afterwards). We applied several ways to  
50 estimate the average time period from case infection to death. Firstly, the median time  
51 from illness to death of a large sample in China was reported as 18.9 days<sup>4</sup>. Secondly,  
52 we found that the peak time of new diagnosis cases in Wuhan should be around  
53 February 5 and the peak time of new deaths in Wuhan is February 23, with a  
54 difference of 18 days. Adding the 4-day average time from infection to confirmation<sup>4</sup>,  
55 the time period should be around 22 days. Thirdly, as reported by Chinese CDC, most  
56 deaths happened 2 weeks to 8 weeks after patients' infections  
57 (<http://www.nhc.gov.cn/jkj/s3578/202002/87fd92510d094e4b9bad597608f5cc2c.shtm>  
58 l). Thus, we believed that the average time period should be around 21 days, which  
59 was consistent with some other study based on a large cohort study<sup>5</sup>. Then, we  
60 assumed the average time period from case infection to death is 21 days and  
61 calculated CFR with a 21-day lag in this study. In addition, we checked the results  
62 based on the lag time varying from 19 to 23 days, and reached the same conclusion.

63 We also collected daily fine particulate matter (PM<sub>2.5</sub>), and inhalable particulate  
64 matter (PM<sub>10</sub>) from National Urban Air Quality Publishing Platform  
65 (<http://106.37.208.233:20035/>), and meteorological data including daily mean  
66 temperature and relative humidity from the China Meteorological Data Sharing  
67 Service System. We conducted a time series analysis to explore the temporal  
68 day-by-day associations of PM<sub>2.5</sub> and PM<sub>10</sub> with CFR of COVID-19. We also  
69 examined the lag effects and patterns of PM<sub>2.5</sub> and PM<sub>10</sub> on CFR by analyzing the  
70 associations between CFR of COVID-19 and single-day PM levels on current day  
71 (lag0) and up to 5 days (lag1 – lag5) before the date of infections.

72

### 73 **Results**

74 Between 19 January 2020 to 15 March 2020, the daily CFR averaged 6.4 with a  
75 range of 1.5%-13.2%, while mean daily PM<sub>2.5</sub> and PM<sub>10</sub> were 47.3 and 56.1  
76 respectively (range: 10.7-100.0 µg/m<sup>3</sup>; 20.3-112.6 µg/m<sup>3</sup>) (**Table 1**). The temporal  
77 trend of daily CFR is highly similar to the temporal variation curves of PM<sub>2.5</sub> and  
78 PM<sub>10</sub> concentrations (**Figure 1**).

79 After adjustment for temperature and relative humidity, CFR was positively  
80 associated with all lag0 – lag5 concentrations of PM<sub>2.5</sub> and PM<sub>10</sub> ( $r > 0.36$ ,  $p < 0.03$ ), and  
81 the associations were the most significant with lag3 PM<sub>2.5</sub> and PM<sub>10</sub> ( $r = 0.65$ ,  
82  $p = 2.8 \times 10^{-5}$  &  $r = 0.66$ ,  $p = 1.9 \times 10^{-5}$ ), suggesting that COVID-19 held higher case  
83 fatality rate with increasing concentrations of PM<sub>2.5</sub> and PM<sub>10</sub> in temporal scale

84 **(Figure 2)**. In addition, we did not find significance in the association between  
85 temperature or relative humidity with COVID-19 CFR ( $r=-0.13$ ,  $p=0.44$  &  $r=0.21$ ,  
86  $p=0.22$ ).

87 Moreover,  $PM_{2.5}$ ,  $PM_{10}$  and CFR significantly decreased over time between 19  
88 January 2020 to 15 March 2020 ( $r=-0.34$ ,  $p=0.038$  &  $r=-0.45$ ,  $p=0.0055$  &  $r=-0.50$ ,  
89  $p=0.015$ ), which may be affected by reduced human activities and improving medical  
90 support. After further adjustment for time effects, CFR of COVID-19 still held a  
91 strong positive association with concentrations of  $PM_{2.5}$  and  $PM_{10}$  ( $r=0.48$ ,  $p=0.0043$   
92 &  $r=0.49$ ,  $p=0.0027$ ).

93

## 94 **Discussion**

95 The results of this study indicated that the death of COVID-19 was highly  
96 correlated with  $PM_{2.5}$  and  $PM_{10}$  concentrations, which has been confirmed in other  
97 studies on respiratory diseases<sup>6</sup>. Most deaths of COVID-19 worldwide have been in  
98 older adults, especially those with underlying health problems, which made the  
99 population more vulnerability from air pollution. Considering the fact that the patients  
100 died from COVID-19 are likely to be critically ill, most of them might stay in ICU for  
101 treatment<sup>7</sup>. We speculated that the impact of  $PM_{2.5}$  and  $PM_{10}$  on death mainly affected  
102 the process of patients developed from mild to severe by potentially increasing system  
103 inflammation and oxidative stress, then decreasing the cardiopulmonary functions and  
104 finally influencing the prognosis of COVID-19 patients<sup>8</sup>. That might be the reason

105 why only PM<sub>2.5</sub> and PM<sub>10</sub> of the first several days in the beginning of infections have  
106 significant associations with CFR.

107 The study was limited to a short period of season with less variation of air  
108 pollution. However, the correlation of trends of death and air pollution is quite  
109 convincing. In addition, there are also likely risks for the individuals with mild  
110 respiratory symptoms who are infected but never diagnosed, leading to a potential  
111 underestimated CFR. Longitudinal studies on a larger cohort would help to  
112 understand the accurate associations between CFR of COVID-19 and air pollution.

113

#### 114 **Author contributions**

115 Dr. Ye Yao, Jinhua Pan, Zhixi Liu and Xia Meng contributed equally.

116 Dr. Weibing Wang and Dr. Haidong Kan contributed equally.

117 Concept and design: Ye Yao, Haidong Kan, and Weibing Wang.

118 Acquisition, analysis, or interpretation of data: Ye Yao, Jinhua Pan, Zhixi Liu, Xia  
119 Meng and Weidong Wang.

120 Drafting of the manuscript: Ye Yao, Jinhua Pan, Zhixi Liu.

121 Critical revision of the manuscript for important intellectual content: Haidong Kan,  
122 and Weibing Wang.

123 Statistical analysis: Ye Yao and Xia Meng.

124

125 **Competing interests**

126 The authors declare no competing interests.

127

128 **Acknowledgements**

129 This study was sponsored by the Bill & Melinda Gates Foundation (Grant No.  
130 OPP1216424).

131

132 **References**

133 1. Cui Y, Zhang ZF, Froines J, et al. Air pollution and case fatality of SARS in the  
134 People's Republic of China: an ecologic study. *Environ Health*. 2003;2(1):15.

135 2. Porcheddu R, Serra C, Kelvin D, Kelvin N, Rubino S. Similarity in Case Fatality Rates  
136 (CFR) of COVID-19/SARS-COV-2 in Italy and China. *J Infect Dev Ctries*.  
137 2020;14(2):125-128.

138 3. Curtis, Callan, and, Frank, Wilczek. On geometric entropy.

139 4. Ilaria Dorigatti, Lucy Okell, Anne Cori NI, et al. Report 4: Severity of 2019-novel  
140 coronavirus (nCoV).

141 <https://www.imperial.ac.uk/media/imperial-college/medicine/sph/ide/gida-fellowshi>

142 [ps/Imperial-College-COVID19-severity-10-02-2020.pdf](https://www.imperial.ac.uk/media/imperial-college/medicine/sph/ide/gida-fellowshi/ps/Imperial-College-COVID19-severity-10-02-2020.pdf). Published 2020. Accessed.

143 5. Verity R, Okell LC, Dorigatti I, et al. Estimates of the severity of COVID-19 disease.



144 2020:2020.2003.2009.20033357.

145 6. Zhou M, Liu Y, Wang L, Kuang X, Xu X, Kan H. Particulate air pollution and mortality

146 in a cohort of Chinese men. *Environ Pollut.* 2014;186:1-6.

147 7. Weiss P, Murdoch DR. Clinical course and mortality risk of severe COVID-19. *Lancet.*

148 2020.

149 8. EPA. Integrated Science Assessments (ISAs). <https://www.epa.gov/isa>. Published

150 2020. Accessed.

151

152

153

154

155

156

157

158

159

160

161

162

163

164

165

166

167

168

169

170

171

Table 1 Description of Daily Case Counts and Weather Conditions

|                                             | Mean   | SD     | Min. | Median | Max.  |
|---------------------------------------------|--------|--------|------|--------|-------|
| Cases                                       |        |        |      |        |       |
| Infection Case Number                       | 788.76 | 489.89 | 94   | 779    | 1516  |
| Death Count                                 | 50.32  | 35.23  | 6    | 37     | 131   |
| Case Fatality Rate (%)                      | 6.43   | 2.97   | 1.51 | 5.94   | 13.24 |
| Meteorological Variables and Air Pollutants |        |        |      |        |       |
| Mean Temperature (□)                        | 7.18   | 4.02   | 1.80 | 5.85   | 18.70 |
| Maximum Temperature (□)                     | 12.75  | 4.78   | 4.70 | 12.85  | 24.90 |

|                                         |       |       |       |       |        |
|-----------------------------------------|-------|-------|-------|-------|--------|
| Minimum Temperature (□)                 | 3.02  | 4.44  | -2.70 | 2.85  | 14.50  |
| Relative Humidity (%)                   | 81.37 | 8.35  | 59.00 | 82.00 | 93.00  |
| PM <sub>2.5</sub> (mug/m <sup>3</sup> ) | 47.25 | 24.16 | 10.71 | 41.77 | 99.96  |
| PM <sub>10</sub> (mug/m <sup>3</sup> )  | 56.07 | 26.50 | 20.33 | 52.77 | 112.58 |

---

172 \* Death counts and case fatality rate were from 8 Feb. to 15 Mar. while all the other indexes were  
173 from 19 Jan. to 25 Feb, as demonstrated in Figure 1.

174

175

176

177

178

179

180

181

182

183

184

185

186

187

188

189

190

191

192

193

194

195

196

197

198

199

200

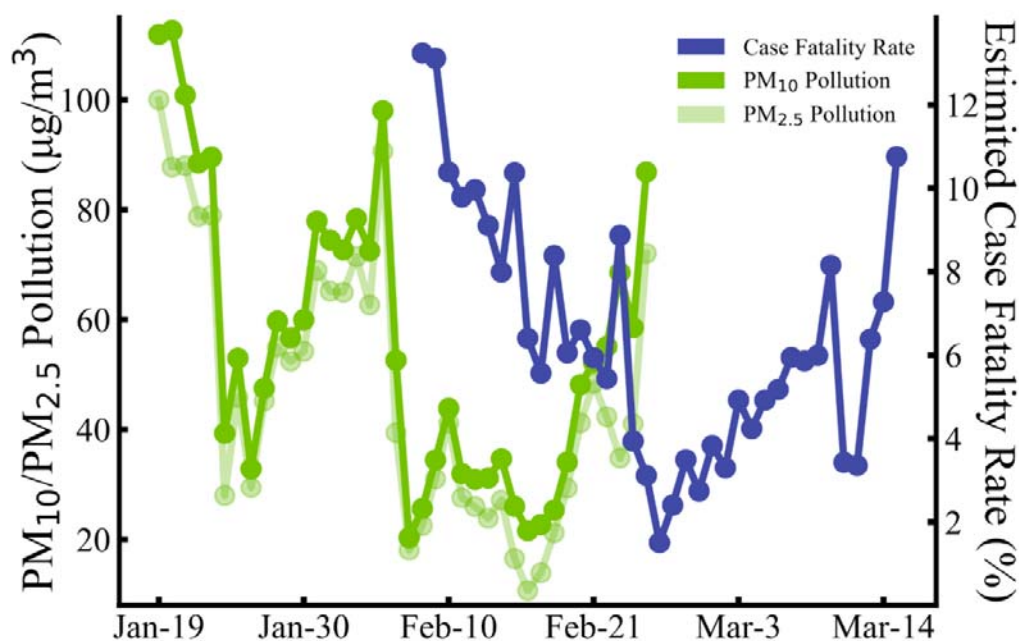

201

202 Figure 1 Daily Case Fatality Rate (blue points), PM<sub>2.5</sub> (light green points) and PM<sub>10</sub>  
203 (green points) Level from February 19 to March 15.

204

205

206

207

208

209

210

211

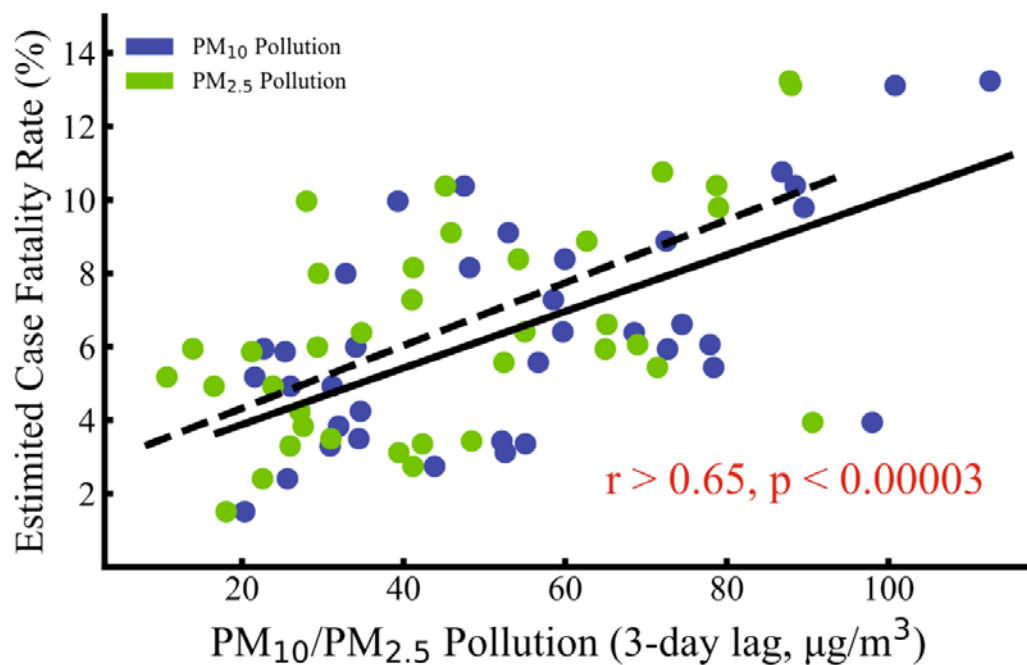

212

213 Figure 2 Daily Case Fatality Rate Versus PM<sub>2.5</sub> and PM<sub>10</sub> pollution.

214 Case fatality rate was positively associated with 3-day lag PM<sub>2.5</sub> (green points,  
215  $r=0.65$ ,  $p=2.8 \times 10^{-5}$ ) and PM<sub>10</sub> (blue points,  $r=0.66$ ,  $p=1.9 \times 10^{-5}$ ) pollution.  
216 Temperature and relative humidity effects have been removed during statistical  
217 analysis.

218

219
